# Supplementary material for: MEA surface passivation of a AgNWs:SnO2 composite transparent electrode enables efficient flexible ITO-free polymer solar cells
Source: Royal Society of Chemistry journal article supplement (doi:10.1039/d1tc02525b), 2021-01-01
Supplement: d1tc02525b1.pdf [file d1tc02525b1.pdf]

## Supporting Information

### MEA Surface Passivation of AgNWs:SnO<sub>2</sub> Composite Transparent Electrode Enables Efficient Flexible ITO-Free Polymer Solar Cells

*He Liu,<sup>ab</sup> Youzhan Li,<sup>ab</sup> Jiang Wu,<sup>\*ab</sup> Yingying Fu,<sup>a</sup> Hao Tang,<sup>ab</sup> Xueting Yi,<sup>ab</sup> and  
Zhiyuan Xie<sup>\*ab</sup>*

<sup>a</sup> *State Key Laboratory of Polymer Physics and Chemistry, Changchun Institute of  
Applied Chemistry, Chinese Academy of Sciences, Changchun 130022, P. R. China.*

<sup>b</sup> *School of Applied Chemistry and Engineering, University of Science and Technology  
of China, Hefei 230026, P. R. China.*

Corresponding authors: r\_wuj33@ciac.ac.cn (J. Wu); xiezy\_n@ciac.ac.cn (Z. Y. Xie)

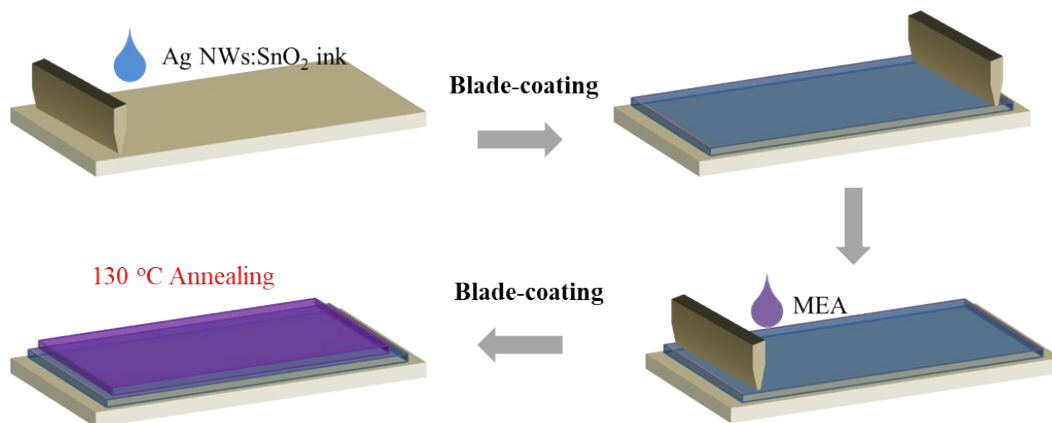

**Figure S1.** Solution-processed procedure of the transparent AgNWs:SnO<sub>2</sub> composite film with MEA surface modification via doctor-blade coating.

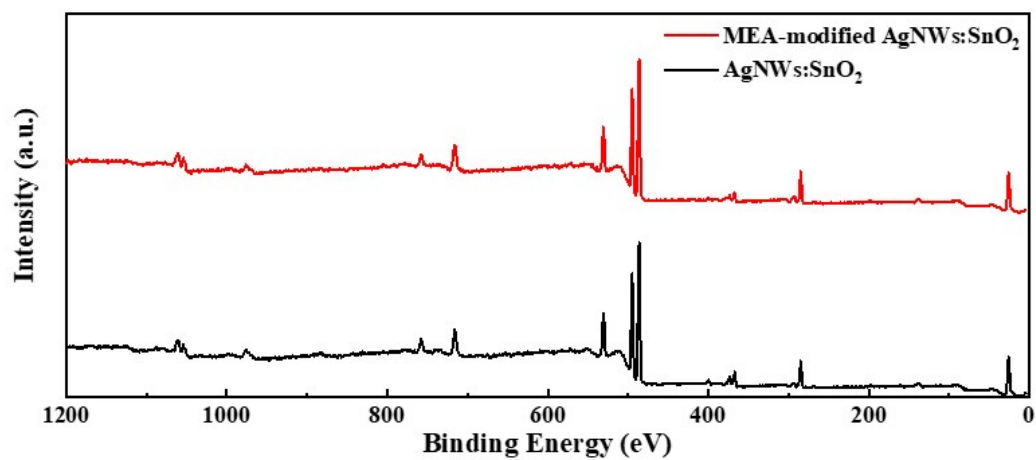

**Figure S2.** The survey XPS spectra of the AgNWs:SnO<sub>2</sub> composite and MEA-modified AgNWs:SnO<sub>2</sub> composite films.

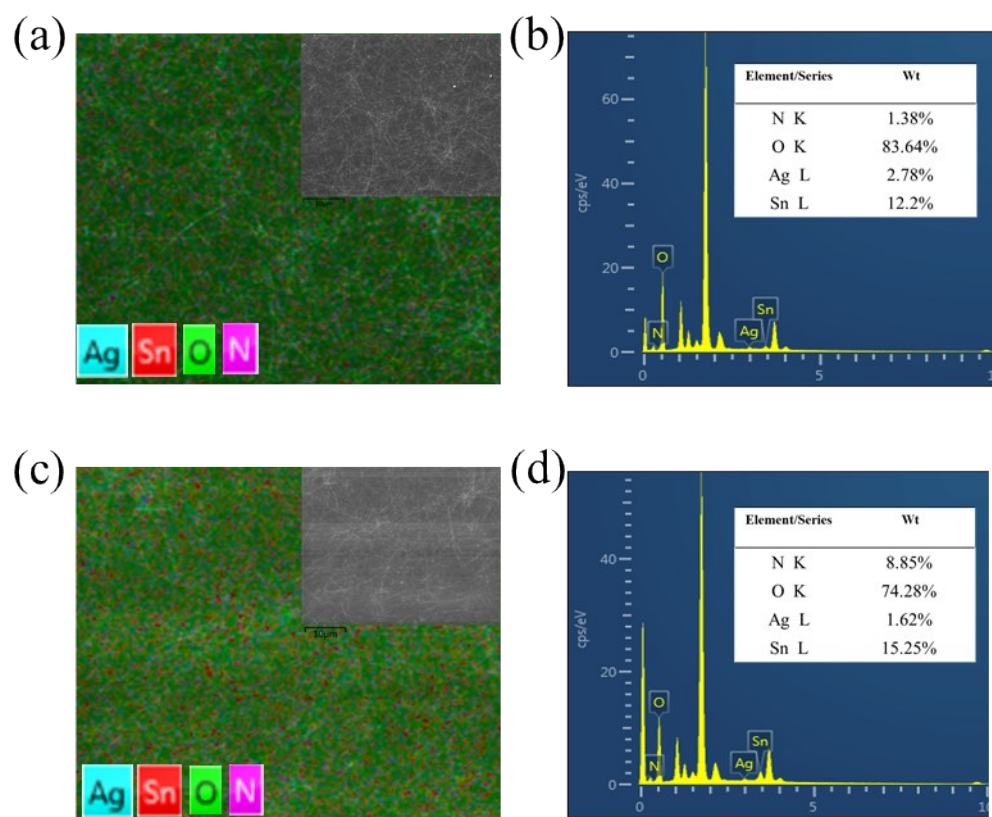

**Figure S3.** (a) The EDS map scanning image and (b) corresponding elements analysis result for the AgNWs-SnO<sub>2</sub> composite film. (c) The EDS map scanning image and (d) corresponding elements analysis result for the MEA-modified AgNWs-SnO<sub>2</sub> composite film.

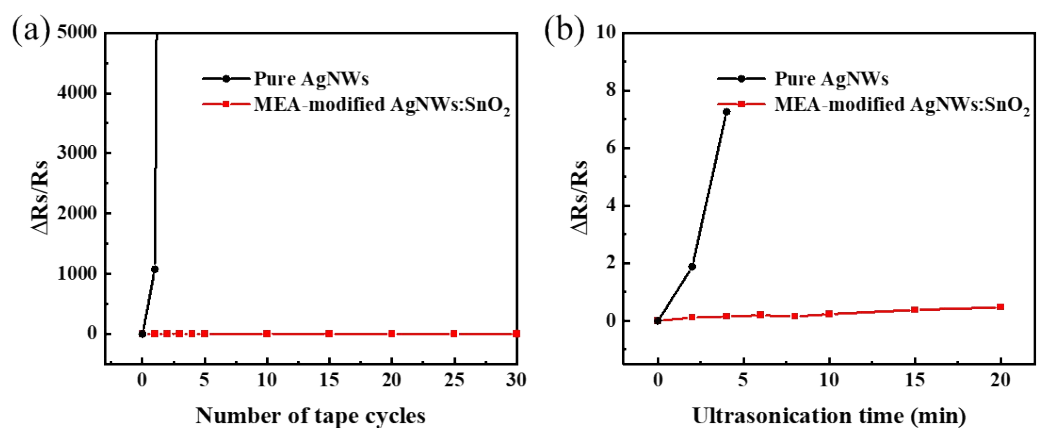

**Figure S4.** (a) Sheet resistance changes as a function of the number of peeling tests for the pure AgNWs and MEA-modified AgNWs:SnO<sub>2</sub> composite films. (b) Sheet resistance changes as a function of ultrasonication time in deionized water with 50W power for the pure AgNWs and MEA-modified AgNWs:SnO<sub>2</sub> composite films.

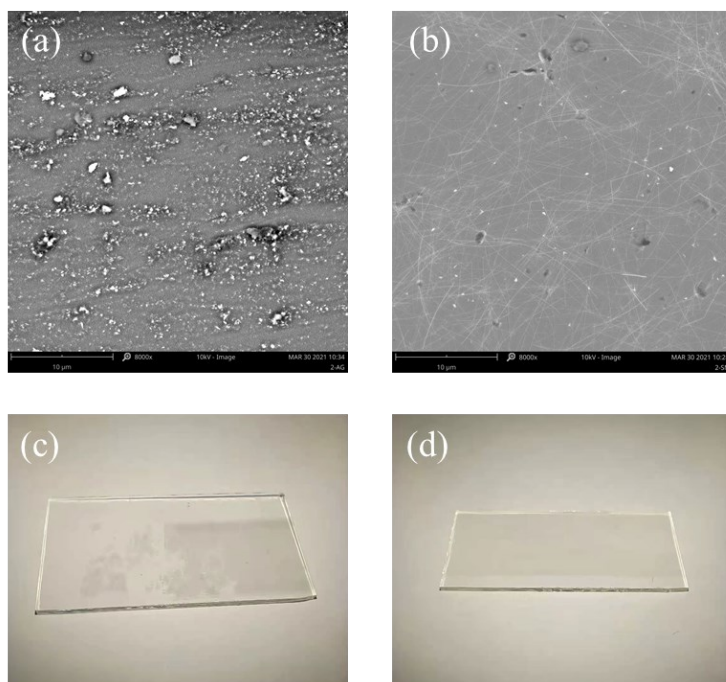

**Figure S5.** SEM images of (a) pure AgNWs film and (b) MEA-modified AgNWs: SnO<sub>2</sub> composite film after ultrasonication treatment. Optical images of (c) pure AgNWs film and (d) MEA-modified AgNWs: SnO<sub>2</sub> composite film after ultrasonication treatment.
